# Supplementary material for: Ordered mesoporous silicas as host for the incorporation and aggregation of octanuclear nickel(ii) single-molecule magnets: a bottom-up approach to new magnetic nanocomposite materials
Source: Royal Society of Chemistry journal article supplement (doi:10.1039/b602838a), 2006-01-01
Supplement: figs1.pdf [file figs1.pdf]

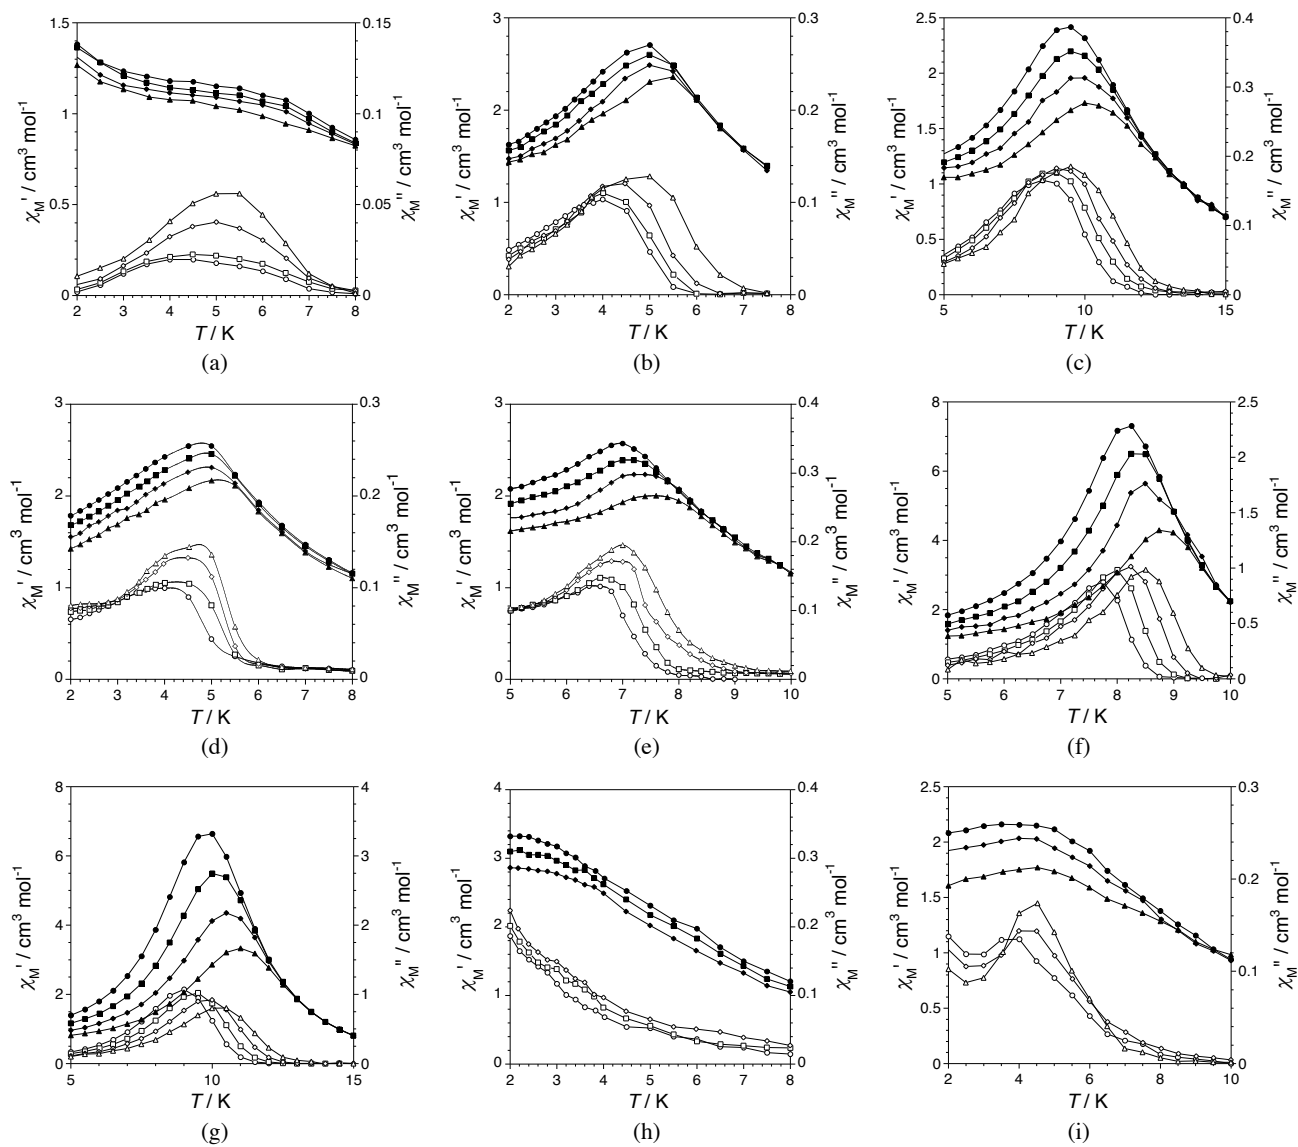

**Fig. S1** Temperature dependence of  $\chi_M'$  and  $\chi_M''$  (open symbols) for **IA–I** (a)–(i) in zero DC field and under 1G AC field at oscillating frequencies of 1 (●), 10 (■), 100 (◆), and 1000 Hz (▲). The solid lines are eye-guides.
