# Supplementary material for: Ordered mesoporous silicas as host for the incorporation and aggregation of octanuclear nickel(ii) single-molecule magnets: a bottom-up approach to new magnetic nanocomposite materials
Source: Royal Society of Chemistry journal article supplement (doi:10.1039/b602838a), 2006-01-01
Supplement: figs2.pdf [file figs2.pdf]

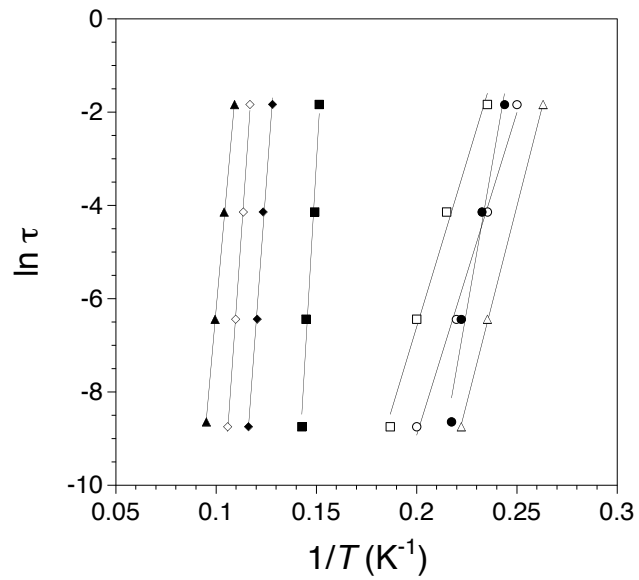

(a)

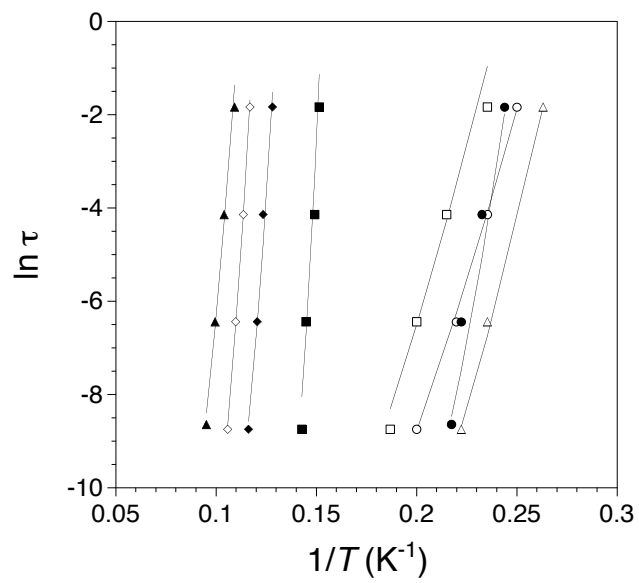

(b)

**Fig. S2** (a) Arrhenius and (b) Vogel-Fulcher plots for **1A** (O), **1B** (□), **1C** (◇), **1D** (●), **1E** (■), **1F** (◆), **1G** (▲), and **1I** (△). The solid lines are the best-fit curves.
